# Supplementary material for: Filamentous Giant Beggiatoaceae from the Guaymas Basin Are Capable of both Denitrification and Dissimilatory Nitrate Reduction to Ammonium
Source: PubMed Central journal article supplement (PMC6052272; doi:10.1128/aem.02860-17), 2018-07-17
Supplement: AEM.02860-17_zam015188652s1.pdf [file AEM.02860-17_zam015188652s1.pdf]

## 1 **Supplementary Methods**

2 **Porewater analysis** – Porewaters from the Guaymas Basin were analyzed for  
3 nitrate+nitrite ( $\text{NO}_x$ ) and  $\text{NH}_4^+$  concentrations colorimetrically using a Flow Solutions IV  
4 segmented flow Auto Analyzer from O.I Analytical, College Station, TX. The HCl-  
5 acidified samples were neutralized with NaOH before analysis.  $\text{NO}_x$  was determined  
6 using the cadmium reduction method and  $\text{NH}_4^+$  was determined using the phenate  
7 method. Both nutrients were diluted to get their concentrations within the linear range of  
8 the auto analyzer. Quality control standards from certified stock standard purchased from  
9 Environmental Research Associates, were analyzed every 15-20 samples.

10 **Fluorescent staining** – Filaments from a white mat were removed with a plastic  
11 pasteur pipette and transferred into a petri dish with cold artificial seawater, moved  
12 around to remove most sediment debris attached to the sheath, and transferred to a glass  
13 petri dish containing 2% formaldehyde in artificial seawater. They were fixed for 30 min  
14 at room temperature, and washed 3x with artificial seawater. After removing most of the  
15 liquid, 1 ml of staining mix was added (0.1 mg/ml fluorescein isothiocyanate (FITC,  
16 Thermo Fisher Scientific) and 8  $\mu\text{M}$  Nile Red (Sigma Aldrich); final concentrations in  
17 PBS) and incubated for 1 hour at room temperature. Filaments were carefully transferred  
18 onto a microscope slide containing a frame made of electrical tape as a space holder to  
19 not crush the filaments when the cover slip is applied. Images were taken with the  
20 confocal laser scanning microscope LSM 780 (Zeiss, Jena, Germany) using the 488 nm  
21 and 561 nm laser.

22 **Scanning electron microscopy** – White, wide filaments were sampled, washed,  
23 and fixed as described for fluorescent staining. Post-fixing, they were washed 3x in

24 MilliQ water. Then, filaments were placed onto poly-lysine-covered silica wafers and  
25 allowed to settle. Gradually, the water was removed by adding and carefully removing  
26 ethanol of the concentrations 30%, 50%, 70%, 80%, and 96%, without letting the sample  
27 run dry. In a critical point dryer (EM CPD300, Leica Microsystems, Wetzlar, Germany)  
28 the ethanol was replaced by liquid CO<sub>2</sub>, which was then let evaporate. The dried wafers  
29 were placed onto a carbon tape on a specimen stub. To break the filaments a second tape-  
30 covered specimen stub was carefully placed on top of the filament-containing one and  
31 removed again. Samples were sputtered with carbon (EM ACE600, Leica Microsystems,  
32 Wetzlar, Germany). Images were taken with a Quanta250 scanning electron microscope  
33 (FEI, Oregon, USA) using 2 kV.

34 **N<sub>2</sub>O production rates** – White FLSB filaments were collected from cores 4862-  
35 02 and 4862-04. Filaments were placed in a cup of seawater overnight and allowed to  
36 form a mat. 40 mL of N<sub>2</sub>-purged surface seawater was added to six 50-mL centrifuge  
37 tubes. The white mat was divided evenly between two centrifuge tubes, representing 5-  
38 10% (3-5 mL) of the total incubation volume. Tubes were filled to 50 mL total volume  
39 with 10 mL of acetylene-purged seawater. All tubes were amended with 50 μM NO<sub>3</sub><sup>-</sup> and  
40 sealed with plastic wrap to limit gas exchange. Mats were incubated at 4°C with  
41 occasional mixing by inversion. Each tube was sampled at 0, 0.5, 1.5, 3.5, 6, 7, 9, and 11  
42 hours following the start of incubation. After the 6-hour time point, the FLSB filaments  
43 were destroyed as described in the main text. Subsamples were collected by gently  
44 mixing and transferring 2 mL liquid, into a 1.5 mL Eppendorf tube containing 25  
45 microliters of 6N HCl. The Eppendorf tubes were sealed tightly with no headspace and  
46 stored under oil to prevent gas exchange. Upon return to the laboratory, 1 mL of each

47 sample was injected into a He-purged 3 mL exetainer and shaken overnight. The  
48 concentration of N<sub>2</sub>O in the headspace was measured on a gas chromatograph with  
49 electron capture detector.

50

51

## 52 **Supplementary Results and Discussion**

53 ***Beggiatoaceae* nitrate reductases** – The candidate NarH gene found in *Ca.*  
54 *Marithrix* (Fig. S2A) was phylogenetically distinct from the tight cluster of candidate  
55 NarH genes found in the other *Beggiatoaceae* (except *Thioploca ingrica*; Fig. S2B); the  
56 different phylogenetically mixed closest neighbors of each group suggest these nitrate  
57 reductases may have been acquired in two separate horizontal transfer events. In all cases,  
58 these predicted NarH genes were located within putative Nar operons and annotated as  
59 nitrate reductase subunits in CDD. No canonical NarH gene was found in the *Thioploca*  
60 *ingrica* genome; the ORF described as NarH by Kojima et al. (1) is closely related to  
61 ORFs in other *Beggiatoaceae* (Fig. S3) that are classified as DMSO reductases in IMG,  
62 and selenate reductases in CDD. Experimental evidence will be needed to clarify the  
63 physiological substrate(s) of these predicted proteins.

64 **Supplementary Figures and Tables**

65

66 **Table S1.** Sampling dates and locations of the cores from which FLSB mats were  
 67 collected. Asterisks indicate cores used for porewater NO<sub>x</sub> and NH<sub>4</sub><sup>+</sup> analysis.

68

| <b>Location</b> | <b>Latitude/<br/>Longitude</b> | <b>Sampling<br/>Date</b> | <b>Dive #</b> | <b>Mat</b>      | <b>Core #</b>                        |
|-----------------|--------------------------------|--------------------------|---------------|-----------------|--------------------------------------|
| Ultra Mound     | 27°00.440 N<br>111°24.528 W    | Dec. 19<br>2016          | 4868          | White           | 7, 8                                 |
| Ultra Mound     | 27°00.445 N<br>111°24.535 W    | Dec. 21<br>2016          | 4869          | White<br>Orange | 1<br>3, 16*, 17, 19, 21*, 26, 29     |
| Cathedral Hill  | 27°00.680 N<br>111°24.270 W    | Dec. 24<br>2016          | 4872          | White<br>Orange | 3, 6*, 12, 22, 23, 24<br>14*, 15, 17 |

69

70

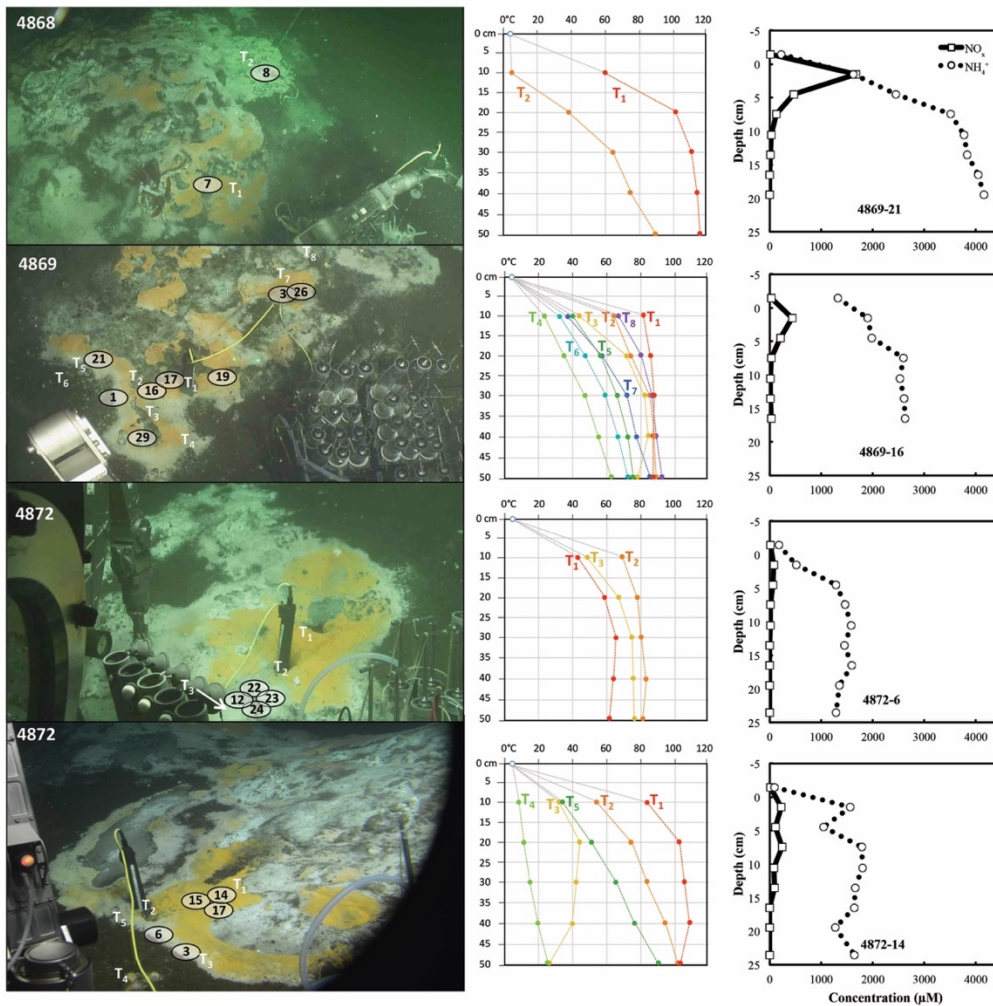

72

73 **Figure S1.** Sampling sites for orange and white FLSB mats as listed in Table S1,74 showing locations of sediment cores for mat collection, porewater  $\text{NO}_x$  and  $\text{NH}_4^+$ 75 analysis, and temperature profiles determined with the *Alvin* heatflow probe (2).

76 Temperature loggers were spaced every 10 cm along the heatflow probe; measurement

77 points started at 10 cm depth when the probe is fully inserted into the sediment. Thermal

78 readings were taken after several minutes to allow the profiles to stabilize. The surface

79 temperature of 3°C is the temperature of Guaymas Basin bottom water.

80 **Table S2.** ORF designations for the *Beggiatoaceae* NO<sub>3</sub><sup>-</sup> reduction pathway genes  
81 displayed in Table 1. Gene candidates were identified by key word and BLASTP  
82 searches of IMG/ER (3). TAT signal peptides were predicted using the TatP 1.0 Server  
83 (4). CDD, Conserved Domain Database (5). Diversity in predicted NO<sub>3</sub><sup>-</sup> respiration  
84 pathways is widespread among members of the *Beggiatoaceae*. As previously described  
85 (6), the large vacuolated chain-forming *Ca. Thiomargarita nelsonii* has complete sets of  
86 predicted genes for both DNRA and denitrification, with the caveat that NirM was not  
87 positively identified. Narrow unvacuolated freshwater *Thioploca ingrica* (1) likewise  
88 may have the potential for both pathways, although some subunits of its candidate NarG  
89 are affiliated with possible DMSO rather than NO<sub>3</sub><sup>-</sup> reductases (Fig. S2B) Large  
90 vacuolated filamentous *Ca. Marithrix sessilis* (7) appears capable of DNRA only, lacking  
91 genes for all but a few accessory denitrification pathway proteins (NirE, NorD, NorQ).  
92 The freshwater *B. alba* is distinct from all of these, as expected from experimental  
93 observations (8): putative genes were found for the non-respiratory periplasmic nitrate  
94 reductase NapA, and for nitrite reduction to ammonium, but not for denitrification.  
95

| Activity  | Proteins                   | Description   | "Beggiatoa" sp. Orange Guaymas | bin ex4572_84_"Beggiatoa" (wide white Guaymas) | <i>Ca. Thiomargarita nelsonii</i> bud S10                          | <i>Thioploca ingrica</i> | <i>Ca. Marithrix sp. Green Canyon 246</i> | <i>Beggiatoa alba</i> B18LD |
|-----------|----------------------------|---------------|--------------------------------|------------------------------------------------|--------------------------------------------------------------------|--------------------------|-------------------------------------------|-----------------------------|
| Nitratory | Nxr/NarG/NxrA <sup>1</sup> | Alpha subunit | BOGUAY_0489                    | Ga0123547_10942_1                              | Ga0063879_01731, Ga0063879_03576, Ga0063879_01732, Ga0063879_03575 | not found                | Ga0199145_101135                          | not found                   |
|           |                            | Beta subunit  | BOGUAY_0490                    | Ga0123547_10942_0                              | Ga0063879_01732, Ga0063879_03575                                   | not found                | Ga0199145_101136                          | not found                   |
|           |                            | Molybdenum    | BOGUAY_0491                    | Ga0123547_10941_8                              | Ga0063879_01733                                                    | not found                | Ga0199145_101137                          | not found                   |

|             |                           |             |                  |                                  |           |                  |           |
|-------------|---------------------------|-------------|------------------|----------------------------------|-----------|------------------|-----------|
|             | <b>cofactor chaperone</b> |             |                  |                                  |           |                  |           |
| <b>NarI</b> | <b>Gamma subunit</b>      | BOGUAY_0492 | Ga0123547_109417 | Ga0063879_01734, Ga0063879_03573 | not found | Ga0199145_101138 | not found |

|                                              |                                                            |                         |                  |           |                  |                   |           |
|----------------------------------------------|------------------------------------------------------------|-------------------------|------------------|-----------|------------------|-------------------|-----------|
| <b>NarG (TAT signal peptide)<sup>1</sup></b> | <b>Alpha subunit</b>                                       | BOGUAY_0051/BOGUAY_0050 | Ga0123547_10332  | not found | Ga0060138_113819 | not found         | not found |
| <b>NarH</b>                                  | <b>Beta subunit</b>                                        | BOGUAY_0049             | Ga0123547_10336  | not found | Ga0060138_113818 | not found         | not found |
| <b>Nar-like reductase</b>                    | <b>NarJ? type II enzyme, heme b subunit</b>                | BOGUAY_0048             | Ga0123547_10337  | not found | Ga0060138_113817 | Ga0199145_106186? | not found |
|                                              | <b>DMSO reductase family</b>                               |                         |                  |           |                  |                   |           |
|                                              | <b>Chaperone TorD involved in molybdoenzyme maturation</b> |                         |                  |           |                  |                   |           |
| <b>NarI</b>                                  | <b>NarI molybdoenzyme</b>                                  | BOGUAY_0046             | Ga0123547_103311 | not found | Ga0060138_113816 | not found         | not found |

|                                      |                                     |             |                                                      |                 |                                       |           |                 |
|--------------------------------------|-------------------------------------|-------------|------------------------------------------------------|-----------------|---------------------------------------|-----------|-----------------|
| <b>Periplasmic nitrate reductase</b> | <b>NapF n-type protein</b>          | BOGUAY_5179 | Ga0123547_100142                                     | Ga0063879_03478 | not found                             | not found | BegalDRAFT_2363 |
|                                      | <b>NapD Chaperone</b>               | not found   | Ga0123547_100141                                     | Ga0063879_03475 | not found                             | not found | BegalDRAFT_2364 |
|                                      | <b>NapA Large subunit</b>           | BOGUAY_0671 | Ga0123547_100140, Ga0123547_13223 ? (has TAT signal) | Ga0063879_03474 | Ga0060138_113718                      | not found | BegalDRAFT_2365 |
|                                      | <b>NapG Ferredoxin-type protein</b> | not found   | Ga0123547_12978, Ga0123547_13224                     | Ga0063879_03473 | Ga0060138_112596 (with nitrous oxide) | not found | BegalDRAFT_2366 |





**NirM** Omitted here because various cytochrome types are found in this position in the putative operons, not sure which one(s) function in nitrite reduction

|                         |                                                            |             |                                                                     |                 |                  |           |           |
|-------------------------|------------------------------------------------------------|-------------|---------------------------------------------------------------------|-----------------|------------------|-----------|-----------|
| <b>NirC</b>             | <b>c-type cytochrome C<sub>55x</sub></b>                   | not found   | Ga0123547_13264<br>? (right position but different cytochrome type) | Ga0063879_04851 | Ga0060138_112609 | not found | not found |
| <b>NirF</b>             | <b>Periplasmic; NirS maturation</b>                        | not found   | Ga0123547_13263                                                     | Ga0063879_04852 | Ga0060138_112608 | not found | not found |
| <b>NirD<sup>2</sup></b> | <b>Siroheme decarboxylase</b>                              | not found   | Ga0123547_13262                                                     | Ga0063879_04853 | Ga0060138_112607 | not found | not found |
| <b>NirL</b>             | <b>Siroheme decarboxylase</b>                              | not found   | Ga0123547_13986                                                     | Ga0063879_04854 | Ga0060138_112606 | not found | not found |
| <b>NirG</b>             | <b>Siroheme decarboxylase</b>                              | not found   | Ga0123547_13985                                                     | Ga0063879_04855 | Ga0060138_112605 | not found | not found |
| <b>NirH</b>             | <b>Siroheme decarboxylase</b>                              | not found   | Ga0123547_13983                                                     | Ga0063879_04856 | Ga0060138_112604 | not found | not found |
| <b>NirJ</b>             | <b>Heme d<sub>1</sub> biosynthesis radical SAM protein</b> | not found   | Ga0123547_13981                                                     | Ga0063879_04857 | Ga0060138_112603 | not found | not found |
| <b>NirE</b>             | <b>Uroporphyrinogen III methyltransferase</b>              | BOGUAY_0877 | Ga0123547_10425                                                     | Ga0063879_05504 | Ga0060138_11548  | not found | not found |

|                               |             |                      |             |                                                                  |                 |                  |           |           |
|-------------------------------|-------------|----------------------|-------------|------------------------------------------------------------------|-----------------|------------------|-----------|-----------|
| <b>Nitric oxide reductase</b> | <b>NorB</b> | <b>Large subunit</b> | BOGUAY_0863 | Ga0123547_11203<br>4,<br>Ga0123547_11922<br>6<br>Ga0123547_11203 | Ga0063879_02916 | Ga0060138_111184 | not found | not found |
|                               | <b>NorC</b> | <b>Small subunit</b> | BOGUAY_4015 | Ga0123547_11922<br>5,<br>Ga0123547_11922<br>5                    | Ga0063879_02915 | Ga0060138_111185 | not found | not found |

|                                |                           |                          |                 |                 |                  |                  |                 |                 |
|--------------------------------|---------------------------|--------------------------|-----------------|-----------------|------------------|------------------|-----------------|-----------------|
| <b>NorD</b>                    | <b>Activation protein</b> | not found                | Ga0123547_10746 | ,               | Ga0063879_04846  | Ga0060138_111180 | Ga0199145_10739 | BegalDRAFT_2688 |
|                                |                           |                          |                 |                 |                  |                  |                 |                 |
| <b>NorE</b>                    |                           | not found                | Ga0123547_11203 | 6               | Ga0063879_02934  | not found        | not found       | not found       |
|                                |                           |                          |                 |                 |                  |                  |                 |                 |
| <b>NorQ</b>                    |                           | not found                | Ga0123547_11203 | 3               | Ga0063879_02936, |                  |                 |                 |
|                                |                           |                          |                 |                 |                  |                  |                 |                 |
|                                |                           | not found                | Ga0123547_12333 | 1,              | Ga0063879_02939, | Ga0060138_111183 | Ga0199145_10740 | BegalDRAFT_1532 |
|                                |                           |                          |                 |                 |                  |                  |                 |                 |
|                                |                           |                          | Ga0123547_13202 |                 | Ga0063879_04308  |                  |                 |                 |
| <b>Nitrous oxide reductase</b> | <b>NosD</b>               | <b>Copper insertion</b>  | not found       | Ga0123547_12979 | Ga0063879_03285  | Ga0060138_112597 | not found       | not found       |
|                                |                           |                          |                 |                 |                  |                  |                 |                 |
|                                | <b>NosZ</b>               | <b>Catalytic subunit</b> | not found       | Ga0123547_11451 | Ga0063879_04858  | Ga0060138_112601 | not found       | not found       |
|                                |                           |                          |                 |                 |                  |                  |                 |                 |
|                                | <b>NosL</b>               | <b>Copper chaperone</b>  | not found       | Ga0123547_12973 | Ga0063879_03264, | Ga0060138_112593 | not found       | not found       |
|                                |                           |                          |                 |                 |                  |                  |                 |                 |
|                                |                           |                          |                 |                 | Ga0063879_02838  |                  |                 |                 |

96

97 <sup>1</sup> Predicted gene sequences suggest two forms of NarG in some species. The second one has  
 98 predicted (4) signal sequences for the twin arginine translocation (TAT) pathway. If these are  
 99 functional in export, this is unexpected in a cytoplasmic nitrate reductase, and suggests some  
 100 alternate role for these proteins.

101 <sup>2</sup> Genes in two different pathways have been designated "*nirD*".



**B) NarH candidates (no homologue found in *Ca. Marithrix*)**

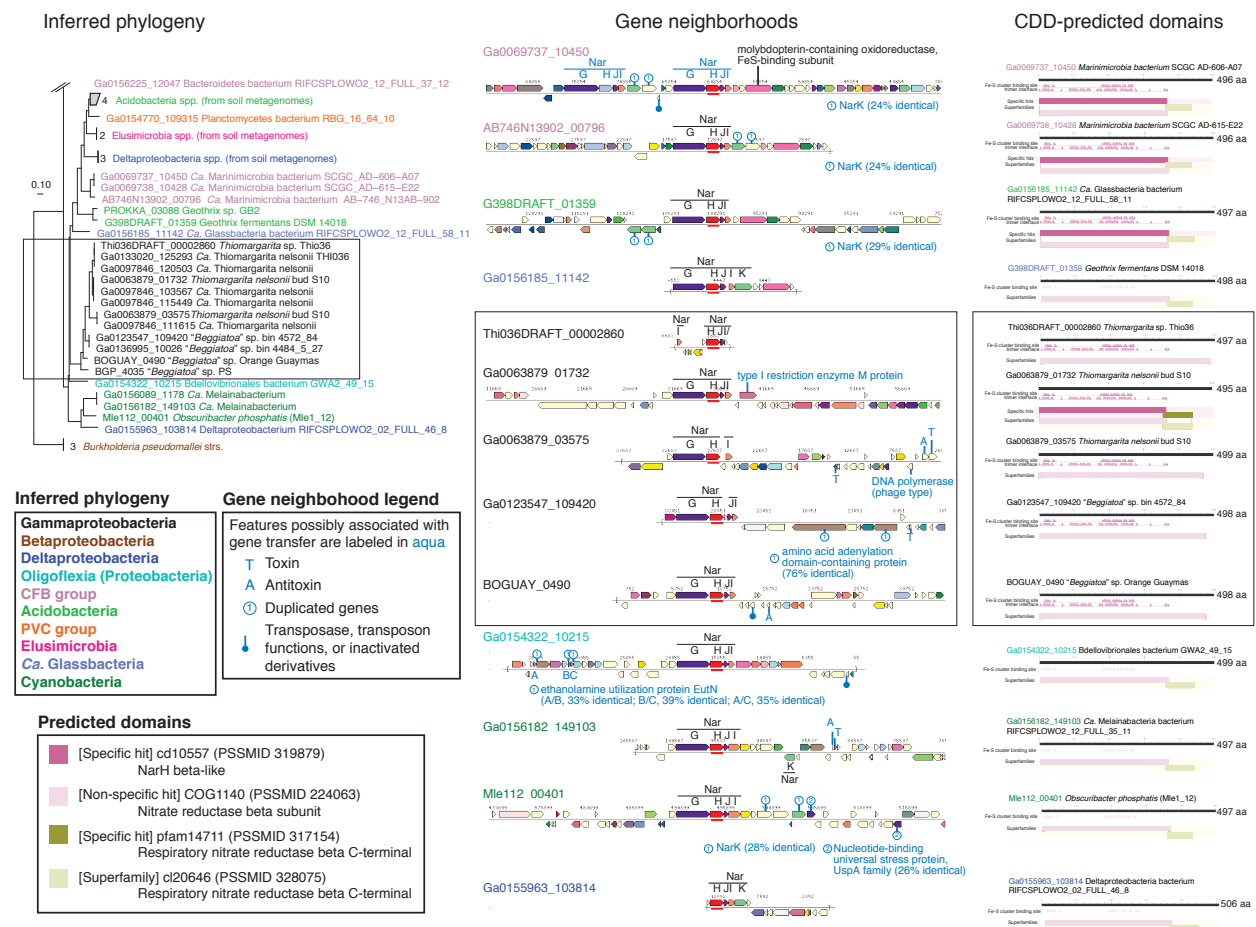

103 Figure S2. A) NarH candidate from *Ca. Marithrix* Green Canyon 246 (segment 3). B) NarH candidates from other *Beggiatoaceae*. Protein  
 104 sequences were selected by BLASTP searches of the IMG/ER database (3) with all annotated *Beggiatoaceae* NarH candidates; the collected  
 105

106 sequences aligned using MUSCLE (9) in MEGA7 (10), with minor adjustments to the alignments made manually; and neighbor joining used to  
107 select closest relatives for subtrees. The final trees were produced using RAxML rapid bootstrapping (11) as implemented in ARB (12), with a  
108 random initial tree, the PROTGAMMA rate distribution and WAG amino acid substitution models, empirical amino acid frequencies, and branch  
109 optimization. The tree shown was the best of 25 runs. Gene neighborhoods are from IMG/ER (3). Full-length segments are 50 kb long  
110 (maximum), centered on the putative NarH genes. Predicted domain structures are from the Conserved Domain Database (5) (the concise view is  
111 shown). Only full-length or near full-length sequences were included in the tree, and in most cases gene neighborhoods are shown only for  
112 relatively long contigs; an exception was made to show the *Ca. Thiomargarita* neighborhoods in Fig. S3.  
113



115 **Figure S3.** Inferred phylogeny, gene neighborhoods, and domain structure for the NarH-like predicted protein in *Thioploca ingrica*. See the Fig.  
116 S2 caption for methods.

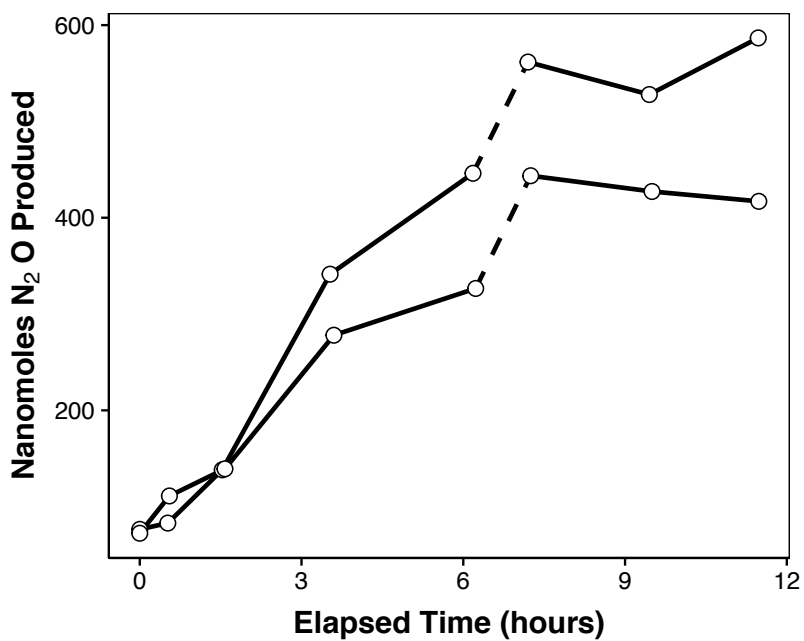

**Figure S4.** N<sub>2</sub>O production in two different white FLSB mats following the addition of 20% acetylene to the seawater medium. The dashed line after ca. 6 hours represents the time point when the FLSB were mechanically destroyed before the incubation was continued.



## Supplementary References

1. Kojima H, Ogura Y, Yamamoto N, Togashi T, Mori H, Watanabe T, Nemoto F, Kurokawa K, Hayashi T, Fukui M. 2014. Ecophysiology of *Thioploca ingrica* as revealed by the complete genome sequence supplemented with proteomic evidence. *ISME J* 9:1166-1176.
2. McKay LJ, MacGregor BJ, Biddle JF, Albert DB, Mendlovitz HP, Hoer DR, Lipp JS, Lloyd KG, Teske AP. 2012. Spatial heterogeneity and underlying geochemistry of phylogenetically diverse orange and white *Beggiatoa* mats in Guaymas Basin hydrothermal sediments. *Deep Sea Res Part 1 Oceanogr Res Pap* 67:21-31.
3. Markowitz VM, Mavromatis K, Ivanova NN, Chen I-MA, Chu K, Kyrpides NC. 2009. IMG ER: a system for microbial genome annotation expert review and curation. *Bioinformatics* 25:2271-2278.
4. Bendtsen JD, Nielsen H, Widdick D, Palmer T, Brunak S. 2005. Prediction of twin-arginine signal peptides. *BMC Bioinformatics* 6:167.
5. Marchler-Bauer A, Lu SN, Anderson JB, Chitsaz F, Derbyshire MK, DeWeese-Scott C, Fong JH, Geer LY, Geer RC, Gonzales NR, Gwadz M, Hurwitz DI, Jackson JD, Ke ZX, Lanczycki CJ, Lu F, Marchler GH, Mullokandov M, Omelchenko MV, Robertson CL, Song JS, Thanki N, Yamashita RA, Zhang DC, Zhang NG, Zheng CJ, Bryant SH. 2011. CDD: a Conserved Domain Database for the functional annotation of proteins. *Nucleic Acids Res* 39:D225-D229.
6. Flood BE, Fliss PS, Jones DS, Dick GJ, Jain S, Kaster A-K, Winkel M, Mußmann M, Bailey J. 2016. Single-cell (meta-)genomics of a dimorphic *Candidatus* *Thiomargarita nelsonii* reveals genomic plasticity. *Front Microbiol* 7:603.
7. Salman-Carvalho V, Fadeev E, Joye SB, Teske A. 2016. How clonal is clonal? Genome plasticity across multicellular segments of a “*Candidatus* *Marithrix* sp.” filament from sulfidic, briny seafloor sediments in the Gulf of Mexico. *Front Microbiol* 7:1173.
8. Vargas A, Strohl WR. 1985. Utilization of nitrate by *Beggiatoa alba*. *Arch Microbiol* 142:279-284.
9. Edgar RC. 2004. MUSCLE: multiple sequence alignment with high accuracy and high throughput. *Nucleic Acids Res* 32:1792-1797.
10. Kumar S, Stecher G, Tamura K. 2016. MEGA7: Molecular Evolutionary Genetics Analysis Version 7.0 for bigger datasets. *Mol Biol Evol* 33:1870-1874.
11. Stamatakis A. 2006. RAxML-VI-HPC: Maximum likelihood-based phylogenetic analyses with thousands of taxa and mixed models. *Bioinformatics* 22:2688-2690.
12. Ludwig W, Strunk O, Westram R, Richter L, Meier H, Yadhukumar, Buchner A, Lai T, Steppi S, Jobb G, Förster W, Brettske I, Gerber S, Ginhart AW, Gross O, Grumann S, Hermann S, Jost R, König A, Liss T, Lüßmann R, May M, Nonhoff B, Reichel B, Strehlow R, Stamatakis A, Stuckmann N, Vilbig A, Lenke M, Ludwig T, Bode A, Schleifer K-H. 2004. ARB: a software environment for sequence data. *Nucleic Acids Res* 32:1363-1371.
